# Supplementary material
Source: MDPI journal article supplement (https://www.mdpi.com/search?q=molbank-2023-M1594)
Supplement: s002 [file molbank-2023-M1594-s002.inchi]

InChI=1S/C23H16BrF4N2.BrH/c1-14-11-30(23-21(27)19(25)18(24)20(26)22(23)28)13-29(14)12-15-6-5-9-17(10-15)16-7-3-2-4-8-16;/h2-11,13H,12H2,1H3;1H/q+1;/p-1
AuxInfo=1/1/N:3,15,14,16,8,7,13,17,9,10,1,5,29,2,6,12,11,27,21,25,19,23,18,28,22,26,20,24,4,30;31/E:(3,4)(7,8)(19,20)(21,22)(25,26)(27,28);/CRV:30+1;/rA:31CCCNCCCCCCCCCCCCCCCFCFCFCFCBrCN+Br-/rB:d1;s2;s2;s4;s5;s6;d7;s8;d6;d9s10;s11;s12;d13;s14;d15;d12s16;;d18;s19;s19;s21;s18;s23;d23;s25;d21s25;s27;s4;s1s18d29;;/rC:11.1925,2.4616,0;12.7325,2.4616,0;13.6375,3.7077,0;13.2083,.9971,0;14.6731,.5212,0;15.8174,1.5518,0;15.497,3.0581,0;16.6413,4.0887,0;18.1061,3.6131,0;17.282,1.0762,0;18.4263,2.1066,0;19.8913,1.6316,0;21.0353,2.6626,0;22.5,2.1876,0;22.8211,.6814,0;21.6771,-.3495,0;20.2122,.1254,0;9.2521,.5208,0;8.1075,1.5513,0;8.4268,3.0577,0;6.6429,1.0752,0;5.498,2.1051,0;8.932,-.9852,0;10.077,-2.0152,0;7.4674,-1.4612,0;7.148,-2.9679,0;6.3229,-.431,0;4.8585,-.9076,0;11.9625,.0918,0;10.7166,.9971,0;14.6093,-2.2895,0;
