# Supplementary material
Source: MDPI journal article supplement (https://www.mdpi.com/search?q=molbank-2023-M1594)
Supplement: s002 [file molbank-2023-M1594-s002.mol]

KingDraw KingDraw.mol
KingDraw2D

 31 33  0  0  0  0  0  0  0  0999 V2000
    5.6689    1.2468    0.0000 C   0  0  0  0  0  0  0  0  0  0  0  0
    6.4489    1.2468    0.0000 C   0  0  0  0  0  0  0  0  0  0  0  0
    6.9073    1.8779    0.0000 C   0  0  0  0  0  0  0  0  0  0  0  0
    6.6899    0.5050    0.0000 N   0  0  0  0  0  0  0  0  0  0  0  0
    7.4318    0.2640    0.0000 C   0  0  0  0  0  0  0  0  0  0  0  0
    8.0114    0.7860    0.0000 C   0  0  0  0  0  0  0  0  0  0  0  0
    7.8491    1.5489    0.0000 C   0  0  0  0  0  0  0  0  0  0  0  0
    8.4287    2.0709    0.0000 C   0  0  0  0  0  0  0  0  0  0  0  0
    9.1706    1.8300    0.0000 C   0  0  0  0  0  0  0  0  0  0  0  0
    8.7532    0.5451    0.0000 C   0  0  0  0  0  0  0  0  0  0  0  0
    9.3328    1.0670    0.0000 C   0  0  0  0  0  0  0  0  0  0  0  0
   10.0748    0.8264    0.0000 C   0  0  0  0  0  0  0  0  0  0  0  0
   10.6542    1.3486    0.0000 C   0  0  0  0  0  0  0  0  0  0  0  0
   11.3961    1.1080    0.0000 C   0  0  0  0  0  0  0  0  0  0  0  0
   11.5587    0.3451    0.0000 C   0  0  0  0  0  0  0  0  0  0  0  0
   10.9793   -0.1770    0.0000 C   0  0  0  0  0  0  0  0  0  0  0  0
   10.2373    0.0635    0.0000 C   0  0  0  0  0  0  0  0  0  0  0  0
    4.6861    0.2638    0.0000 C   0  0  0  0  0  0  0  0  0  0  0  0
    4.1064    0.7857    0.0000 C   0  0  0  0  0  0  0  0  0  0  0  0
    4.2681    1.5487    0.0000 F   0  0  0  0  0  0  0  0  0  0  0  0
    3.3646    0.5446    0.0000 C   0  0  0  0  0  0  0  0  0  0  0  0
    2.7847    1.0662    0.0000 F   0  0  0  0  0  0  0  0  0  0  0  0
    4.5240   -0.4990    0.0000 C   0  0  0  0  0  0  0  0  0  0  0  0
    5.1039   -1.0207    0.0000 F   0  0  0  0  0  0  0  0  0  0  0  0
    3.7822   -0.7401    0.0000 C   0  0  0  0  0  0  0  0  0  0  0  0
    3.6204   -1.5032    0.0000 F   0  0  0  0  0  0  0  0  0  0  0  0
    3.2025   -0.2183    0.0000 C   0  0  0  0  0  0  0  0  0  0  0  0
    2.4608   -0.4597    0.0000 Br  0  0  0  0  0  0  0  0  0  0  0  0
    6.0589    0.0465    0.0000 C   0  0  0  0  0  0  0  0  0  0  0  0
    5.4279    0.5050    0.0000 N   0  0  0  0  0  0  0  0  0  0  0  0
    7.3995   -1.1596    0.0000 Br  0  0  0  0  0  0  0  0  0  0  0  0
  2  4  1  0
  4 29  1  0
 30  1  1  0
  1  2  2  0
  2  3  1  0
 30 18  1  0
  4  5  1  0
  5  6  1  0
  6  7  1  0
  7  8  2  0
  8  9  1  0
  9 11  2  0
 11 10  1  0
 10  6  2  0
 11 12  1  0
 12 13  1  0
 13 14  2  0
 14 15  1  0
 15 16  2  0
 16 17  1  0
 17 12  2  0
 18 23  1  0
 23 25  2  0
 25 27  1  0
 27 21  2  0
 21 19  1  0
 19 18  2  0
 19 20  1  0
 21 22  1  0
 23 24  1  0
 25 26  1  0
 27 28  1  0
 29 30  2  0
M  CHG  2  30   1  31  -1
M  END
